# Supplementary material for: Lactones 41. Synthesis and Microbial Hydroxylation of Unsaturated Terpenoid Lactones with p-Menthane Ring Systems
Source: Molecules. 2013 Mar 1;18(3):2778–87. doi: 10.3390/molecules18032778 (PMC6269982; doi:10.3390/molecules18032778)

# Supplementary Materials

## List of contents

|                                                                                                     |    |
|-----------------------------------------------------------------------------------------------------|----|
| $^1\text{H}$ -NMR spectrum of <b>2</b> (Figure 1).....                                              | S1 |
| $^{13}\text{C}$ -NMR spectrum of <b>2</b> (Figure 2).....                                           | S2 |
| $^1\text{H}$ -NMR spectrum of <b>3</b> (Figure 3).....                                              | S2 |
| $^{13}\text{C}$ -NMR spectrum of <b>3</b> (Figure 4).....                                           | S3 |
| $^1\text{H}$ -NMR spectrum of <b>4</b> (Figure 5).....                                              | S3 |
| $^{13}\text{C}$ -NMR spectrum of <b>4</b> (Figure 6).....                                           | S4 |
| CGC chromatograms of lactones ( $\pm$ )- <b>2</b> , (+)- <b>2</b> and (–)- <b>2</b> (Figure 7)..... | S4 |

**Figure 1.**  $^1\text{H}$ -NMR ( $\text{CDCl}_3$ , 600 MHz) spectrum of **2**.

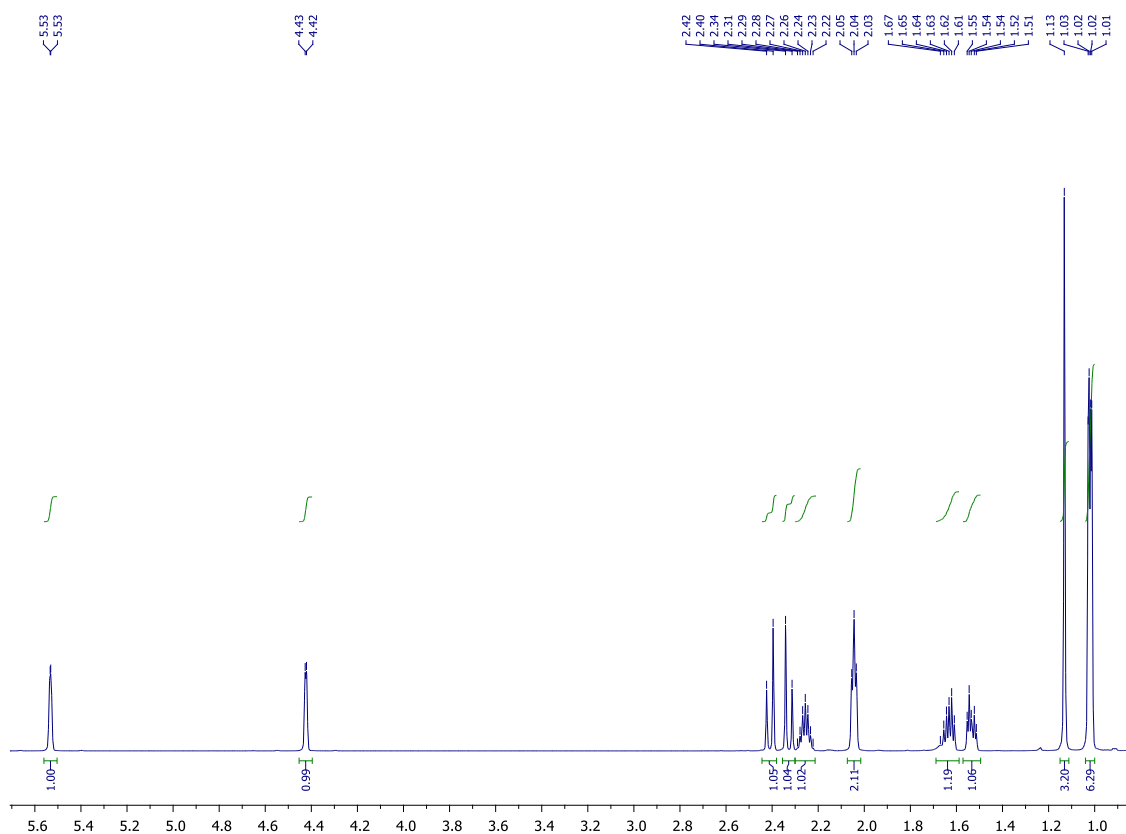

**Figure 2.**  $^{13}\text{C}$ -NMR ( $\text{CDCl}_3$ , 151 MHz) spectrum of **2**.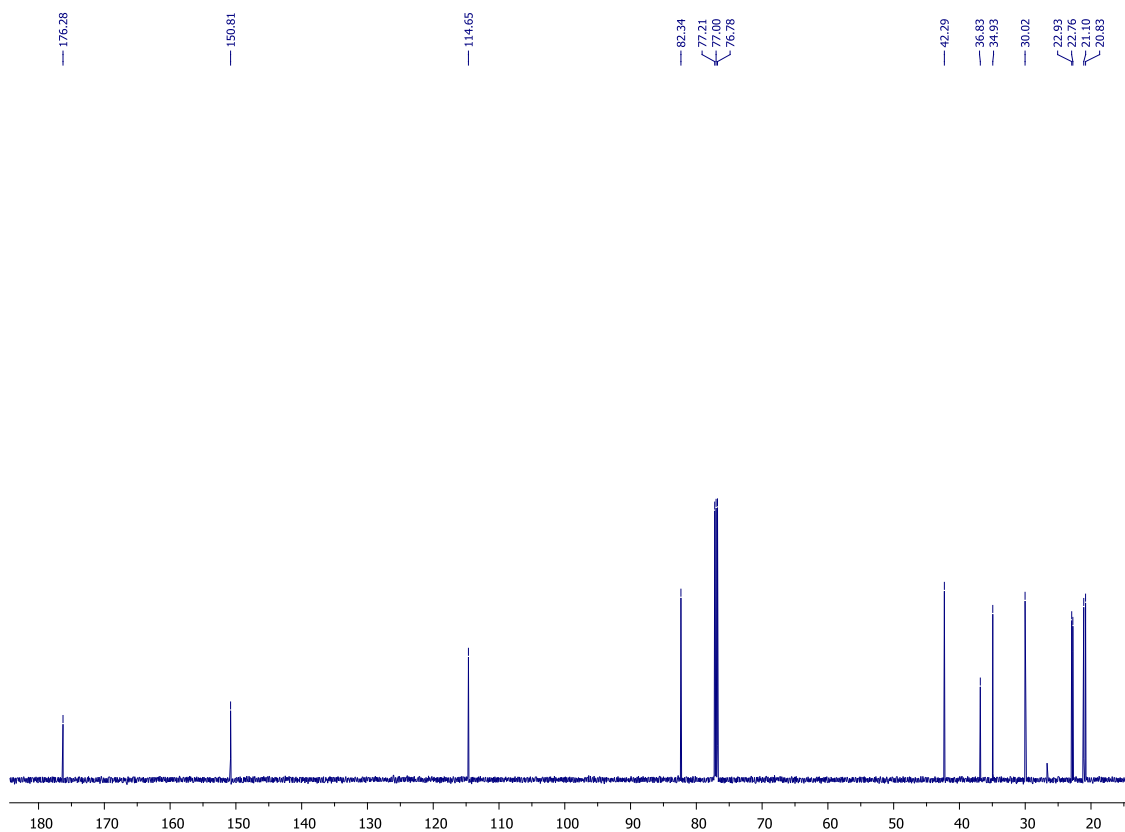**Figure 3.**  $^1\text{H}$ -NMR ( $\text{CDCl}_3$ , 600 MHz) spectrum of **3**.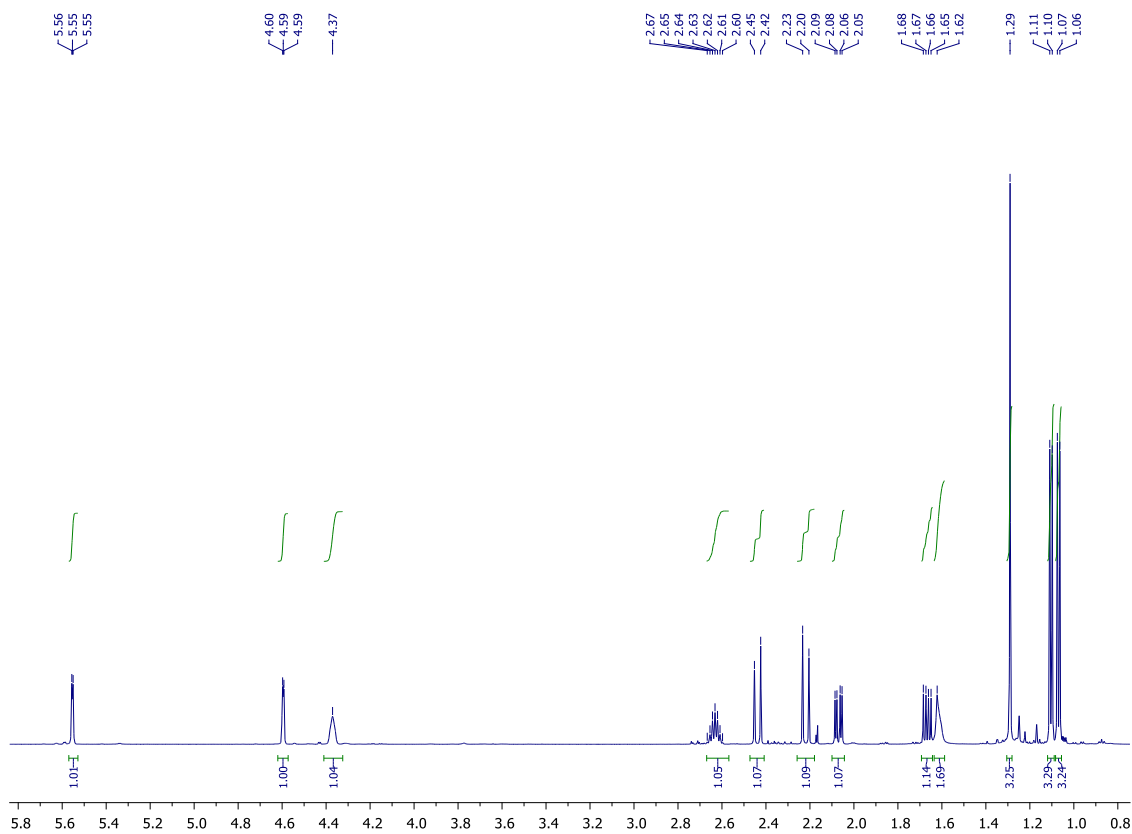

**Figure 4.**  $^{13}\text{C}$ -NMR ( $\text{CDCl}_3$ , 151 MHz) spectrum of **3**.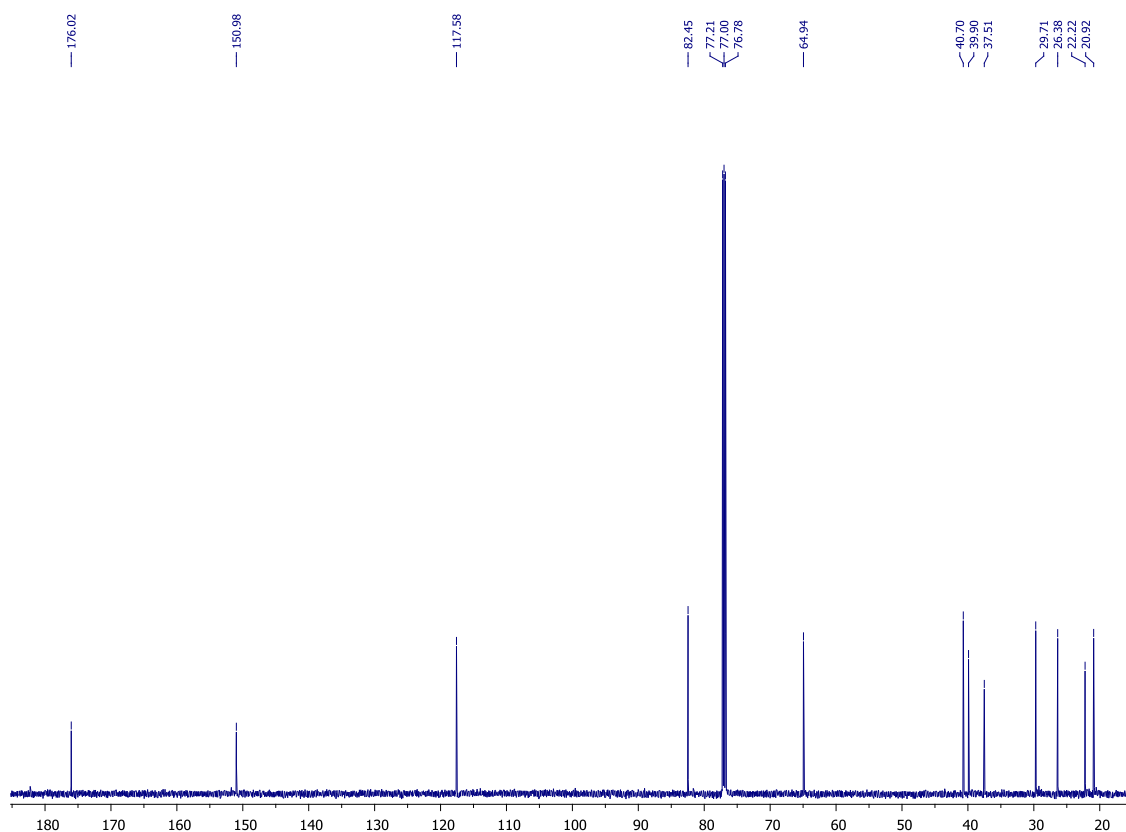**Figure 5.**  $^1\text{H}$ -NMR ( $\text{CDCl}_3$ , 600 MHz) spectrum of **4**.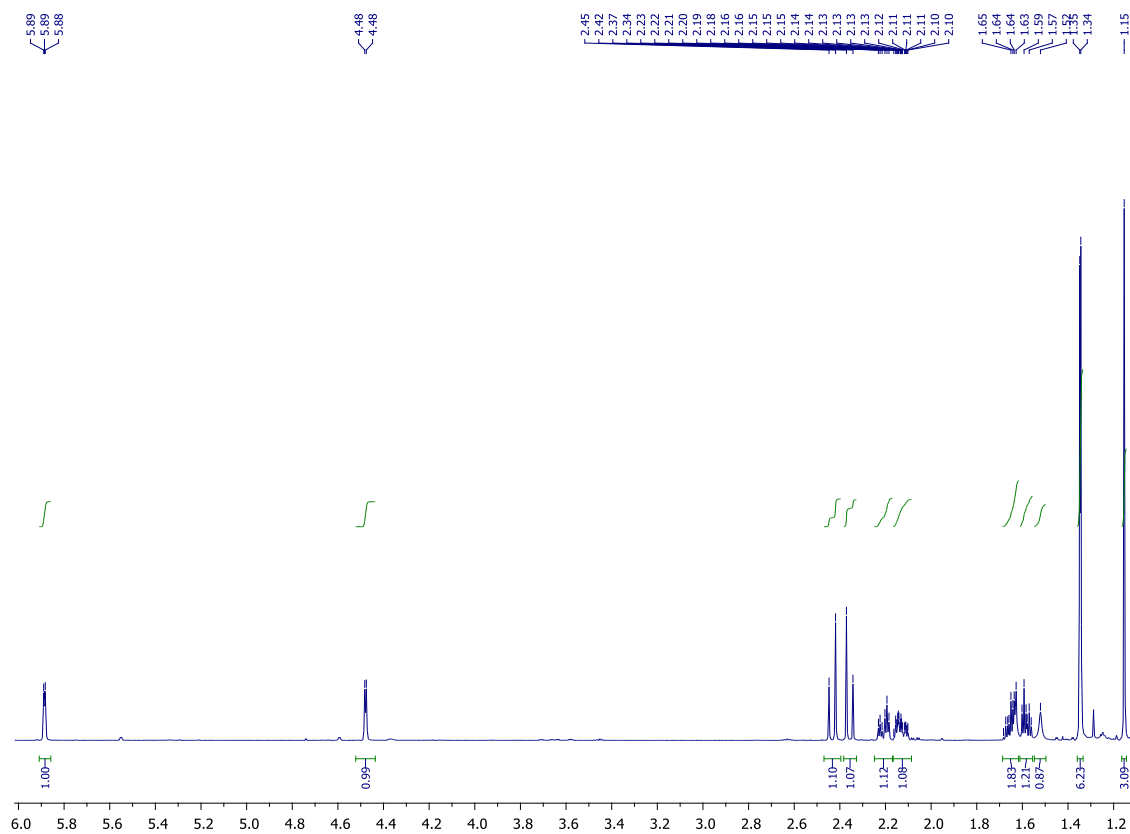

**Figure 6.**  $^{13}\text{C}$ -NMR ( $\text{CDCl}_3$ , 151 MHz) spectrum of **4**.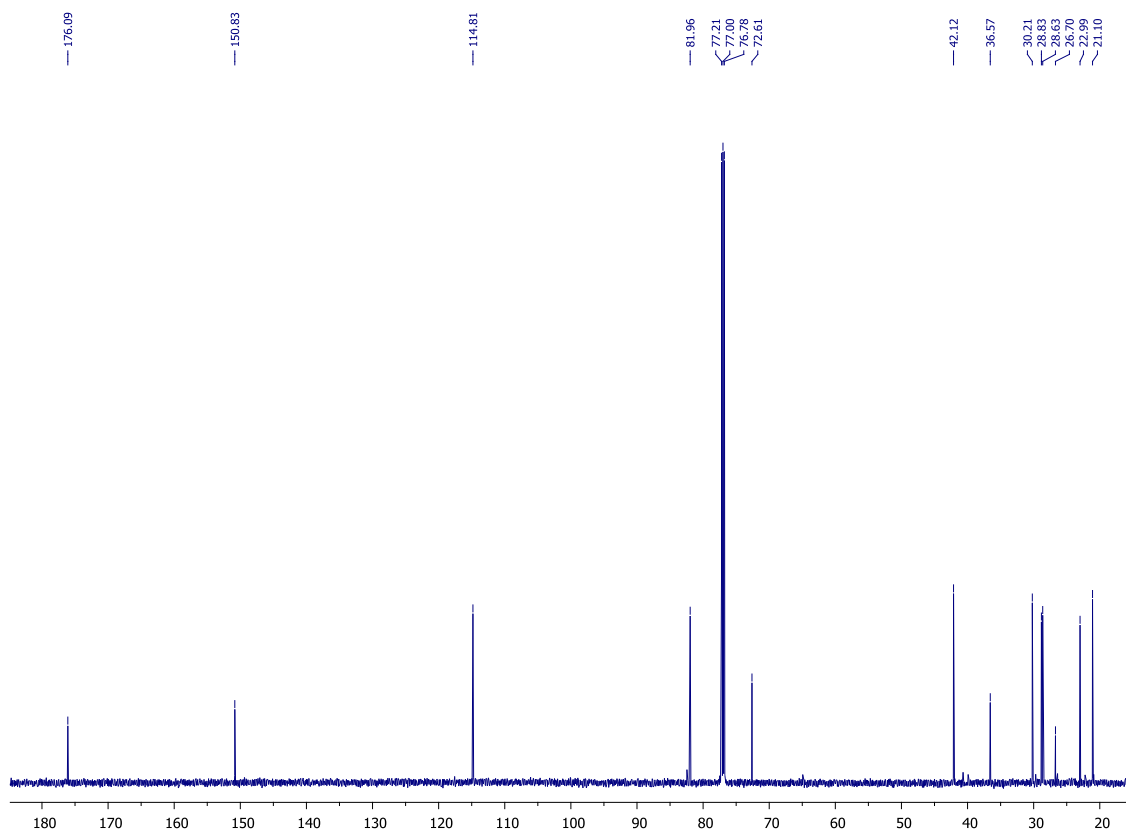**Figure 7.** CGC chromatograms of unsaturated lactones: (a)  $(\pm)$ -**2**; (b) (+)-**2**,  $ee = 96\%$ ; (c) (−)-**2**,  $ee = 98\%$ .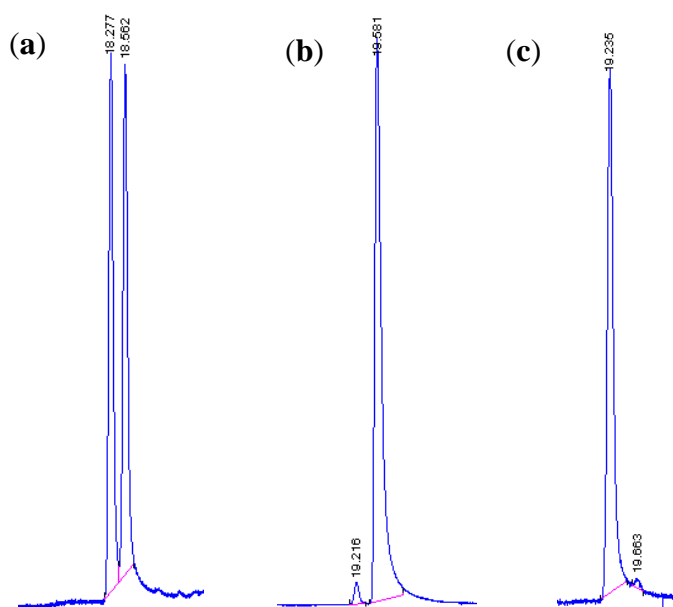

Supplement: Supplementary file 1 [file molecules-18-02778-s001.pdf]
